# Supplementary material
Source: ML conference proceedings conference paper supplement (https://aclanthology.org/2020.emnlp-main.85)
Supplement: OptionalSupplementaryMaterial [file crowdsource_data_stub.xlsx]

## Sheet: 1
question	answer	fixed_spelling	Alice	Bob	Combined
Name something you’d find in outer space.	moon	moon	moon	space rock	moon
	earth	earth	planet	earth	planet
	comet	comet	meteor/asteroid/comet	space rock	space rock
	sun	sun	star	star	star / sun
	clouds	clouds	clouds	?	?
	meteor	meteor	meteor/asteroid/comet	space rock	space rock
	asteroid	asteroid	meteor/asteroid/comet	space rock	space rock
	planet	planet	planet	planet	planet
	star	star	star	star	star / sun
			8	8	8

## Sheet: 2
question	answer	fixed_spelling	Carol	Dan	Combined
Name a type of produce.	aaple	apple	fruit	fruit	fruit
	banana	banana	fruit	fruit	fruit
	broccoli	broccoli	vegetable	vegetable	vegetable
	na	na	?	?	?
	wheat	wheat	?	grains	?
	fruit	fruit	fruit	fruit	fruit
	fruits	fruits	fruit	fruit	fruit
	broccoli	broccoli	vegetable	vegetable	vegetable
	vegetable	vegetable	vegetable	vegetable	vegetable
	fruit or vegetable	fruit	fruit	fruit	fruit
			11	8	9
